1 **Gut microbiota features of the geographically diverse Indian population**

2 Sudarshan A. Shetty

3 Laboratory of Microbiology, Wageningen University and Research, The Netherlands.

4 Contact: [sudarshan.shetty@wur.nl](mailto:sudarshan.shetty@wur.nl)

5

6

7

8

9

10

11

12

13

14

15

16

17

18

19

20

21

22

23

24

25

26

27

28

29 **Abstract**

30 Population-level microbial profiling allows for identifying the overarching features of the  
31 microbiome. Knowledge of population specific base-line gut microbiome features is important  
32 due to the widely reported impact of geography, lifestyle and dietary patterns on the  
33 microbiome composition, structure and function. Here, the gut microbiota of more than 1000  
34 subjects across the length and breadth of India is presented. The publicly available 16S rRNA  
35 gene profiling data of faecal microbiota from the Landscape Of Gut Microbiome - Pan-India  
36 Exploration (LogMPIE) study representing 14 major cities, covering populations from  
37 northern, southern, eastern and western part of India analyzed. Majority of the dominant OTUs  
38 belonged to the Firmicutes, Bacteroidetes and Proteobacteria phyla. The rarer fraction was  
39 comprised of OTUs mainly from the phyla Verrucomicrobia and Spirochaetes. The median core  
40 size was estimated to consist of 12 OTUs (>80% prevalence) dominated by representing genera  
41 *Prevotella*, *Faecalibacterium*, *Bacteroides*, *Roseburia*, *Megasphaera*, *Eubacterium* and  
42 *Gemmiger*. Geographic location explained majority of the variation in the gut microbiota  
43 community structure. The observations of the present study support the previous reports of  
44 *Prevotella* dominance in the Indian population. The *Prevotella/Bacteroides* ratio was high for  
45 the overall population irrespective of geographic location and did not correlate with BMI or age  
46 of the participants. Despite a rapid transition towards a western lifestyle, high prevalence of  
47 *Treponema* in the Indian gut microbiota suggests that the urban population still harbors  
48 signatures of the traditional gut microbiome. The results presented here improve the knowledge  
49 of baseline microbiota in the Indian population across the length and breadth of the country.  
50 This study provides a base for future studies which need to incorporate numerous other  
51 confounding factors and their impact on the observed characteristics of the Indian gut  
52 microbiome.

53 **Keywords:** Population-level, gut microbiota, core microbiota, Prevotella, Indian gut  
54 microbiome

55

## 56 **Introduction**

57 Numerous population-level studies have been conducted to investigate base-line as well as  
58 population specific characteristics of the human gut microbiome. These included human  
59 populations from the USA, Netherlands, Belgium, Denmark, Spain, Africa, Venezuela, China,  
60 Mongolia, Fiji, Israel and Papua New Guinea (Qin *et al.*, 2010, Jalanka-Tuovinen *et al.*, 2011,  
61 Huttenhower *et al.*, 2012, Qin *et al.*, 2012, Yatsunenکو *et al.*, 2012, Lahti *et al.*, 2014, Li *et al.*,  
62 2014, Zhang *et al.*, 2014, Martínez *et al.*, 2015, O'Keefe *et al.*, 2015, Yano *et al.*, 2015, Falony  
63 *et al.*, 2016, Rothschild *et al.*, 2018). These studies have uncovered a vast diversity of the gut  
64 microbial communities as well as identified several factors influencing the microbiome,  
65 including age, ethnicity, dietary patterns, geographical location, consistency of faecal samples  
66 (Bristol stool chart), lifestyle, etc. It is commonly observed that *Bacteroides* is associated with  
67 high protein diet while *Prevotella* is associated with high fibre diet (David *et al.*, 2014,  
68 Gorvitovskaia *et al.*, 2016). Several bacteria have been identified as part of the core microbiota  
69 in diverse populations as well as common core functions have been reported (Turnbaugh *et al.*,  
70 2009, Jalanka-Tuovinen *et al.*, 2011, Huse *et al.*, 2012, Li *et al.*, 2014, Falony *et al.*, 2016).  
71 These studies have directed mechanistic studies and clinical trials for identifying health and  
72 disease related diagnostic biomarkers and development of strategies for modulation of the  
73 microbiome for health benefits (De Filippo *et al.*, 2010, Cotillard *et al.*, 2013, David *et al.*,  
74 2014, Schubert *et al.*, 2014, Zeller *et al.*, 2014, O'Keefe *et al.*, 2015, Baxter *et al.*, 2016, Desai  
75 *et al.*, 2016).

76 However, similar information on population-level characteristics of the gut microbiota in a  
77 Indian subjects with representative sampling across its geography are limited (Ghosh *et al.*,  
78 2013, Shetty *et al.*, 2013, Dehingia *et al.*, 2015, Bhute *et al.*, 2016). Previously, the importance  
79 of understanding the complexity and diversity of the gut microbiome in the Indian population  
80 was reviewed (Shetty *et al.*, 2013). Several features that make the subjects in the Indian sub-

81 continent different such as dietary habits, socio-economic situations, societal traditions of  
82 dietary habits, vast genetic diversity as well as prevalence of diseases not associated with altered  
83 gut microbiome was documented (Shetty *et al.*, 2013). The YY- paradox is an important  
84 differentiating factor of human populations in the Indian sub-continent, where Indians with  
85 same body mass index as a Western individual have three times the fat content (Yajnik &  
86 Yudkin, 2004). This makes the application of BMI to classify obese and non-obese status  
87 debatable for the Indian population (Yajnik & Yudkin, 2004, Shetty *et al.*, 2013). A first step  
88 towards better understanding the role of gut microbiome on health is to catalogue the population  
89 specific microbial diversity, composition and structure using a large representative sample. This  
90 “stamp-collection” process has been a driving factor for several of the currently known disease  
91 and health associations and development of potential microbiome biotherapeutic candidates  
92 (Qin *et al.*, 2012, Everard *et al.*, 2013, Lahti *et al.*, 2014, Dao *et al.*, 2015, Falony *et al.*, 2016,  
93 Plovier *et al.*, 2017, Shetty *et al.*, 2017). These features can be further linked to several  
94 populations specific features as well as individual-specific microbiota features using extensive  
95 phenotyping and measurement of environmental covariates (Falony *et al.*, 2016).

96 Here, results from the largest standardized collection of the gut microbiota profiles of  
97 heterogeneous Indians subjects across geography is presented. The primary focus of the study  
98 was to identifying compositional variation, similarities and dissimilarities in gut microbial  
99 community structure and identifying the core microbiota across geographic landscape.  
100 Furthermore, the underlying variation across the gut microbial community structure was found  
101 to be associated with the *Prevotella/Bacteroides* ratio.

## 102 **Results and Discussion**

### 103 ***Brief description of the study population***

104 The detailed the subject data is described in the original article reporting the LogMPIE study  
105 (Dubey *et al.*, 2018). Briefly, the study reported microbial profile of 1004 Indian individuals

106 residing in 14 cities different cities. These broadly covered the populations representative of  
107 north, west, east and south geographic areas of the country. Data on lifestyle, body mass index  
108 (BMI), age and gender were reported. The mean and standard deviation for age was  $37.2 \pm 11.9$ ,  
109 for BMI was  $27.9 \pm 4.9$  represented by 420 females and 584 males. Out of the 1004 subjects,  
110 556 were categorised as non-obese and 448 as obese based on the BMI. The subjects were  
111 further categorised following a sedentary and non-sedentary lifestyle. The metadata was limited  
112 to these factors and other important metadata such as dietary intake (vegetarian/non-vegetarian,  
113 ratio of carbohydrates to protein in diet, consumption of yogurt with live bacterial cultures,  
114 etc.), stool consistency, history of medications was not reported. Therefore, the preliminary  
115 analysis here does not address the effects and/or contribution of these factors to the variation in  
116 gut microbiota.

#### 117 ***Microbial composition and community level variation across geography***

118 The microbiota composition showed differences at phylum level in individuals from the  
119 different geographic zones (Figure 1). Prominent differences in relative abundance were  
120 observed in the phyla Bacteroidetes, Firmicutes and Proteobacteria. Individuals from east and  
121 north harboured higher abundances of Bacteroidetes compared to west and south. Individuals  
122 from north and south harboured relative higher abundance of Spirochaetes (Figure 1).

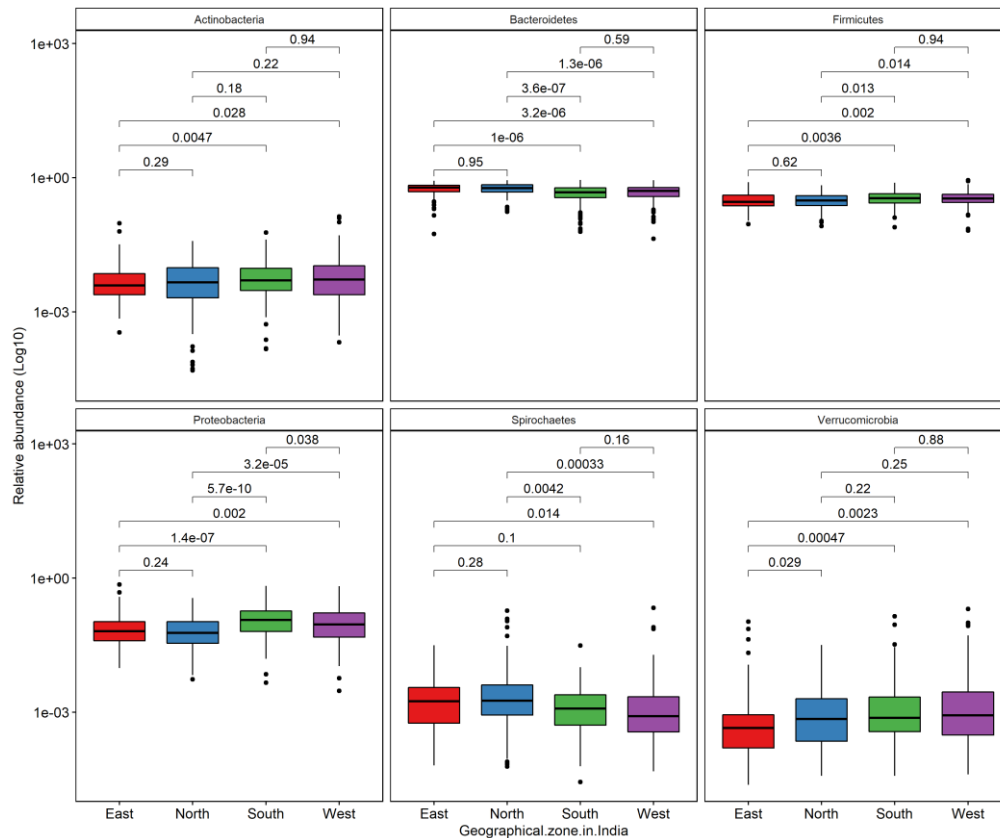

123

124 **Figure 1:** Comparison of relative abundances of major phyla in the gut microbiota of Indians. The p-values were  
125 calculated using Wilcoxon test.

126 At genus level, *Prevotella* was abundant across the geographic landscape, followed by  
127 *Faecalibacterium* (Figure 2). Genus *Bacteroides*, *Megasphaera*, *Parasutterella*, *Haemophilus*  
128 showed variable abundances, where few individuals had more than 0.4 (proportional)  
129 abundance. Comparison of microbiota of Indians with other populations has reported the  
130 enrichment of *Prevotella* and *Megasphaera* (Bhute *et al.*, 2016). The observation in a large  
131 population here provides further support for their association with Indian gut microbiota.  
132 *Megasphaera* is a butyrate and propionate producer both of which are known for anti-  
133 inflammatory properties (Hosseini *et al.*, 2011, Lin *et al.*, 2012, Louis & Flint, 2017). The  
134 observation of variable abundances of *Parasutterella* and *Haemophilus* is intriguing as these  
135 are hardly reported to be highly prevalent and/or abundant in gut microbiota of healthy western  
136 adults (Human Microbiome Project, 2012, Falony *et al.*, 2016). However, abundance of

137 *Parasutterella* was associated with urban Mongolian microbiota (Zhang *et al.*, 2014). The  
138 physiological and metabolic characterization is currently focused on the anaerobic lifestyle of  
139 bacteria from Bacteroidetes phyla, Lachnospiraceae and Ruminococcaceae families (Barcenilla  
140 *et al.*, 2000, Sonnenburg *et al.*, 2010, Flint *et al.*, 2012, Flint *et al.*, 2012, Reichardt *et al.*, 2014).  
141 All of which have been reported to be dominant in the Western population. However,  
142 microbiota analysis of non-western populations advocates the need to focus on obligate  
143 anaerobic bacteria from phyla Proteobacteria and Spirochaetes to understand their role in health  
144 of non-western adults (Martínez *et al.*, 2015, Bhute *et al.*, 2016, Das *et al.*, 2018).

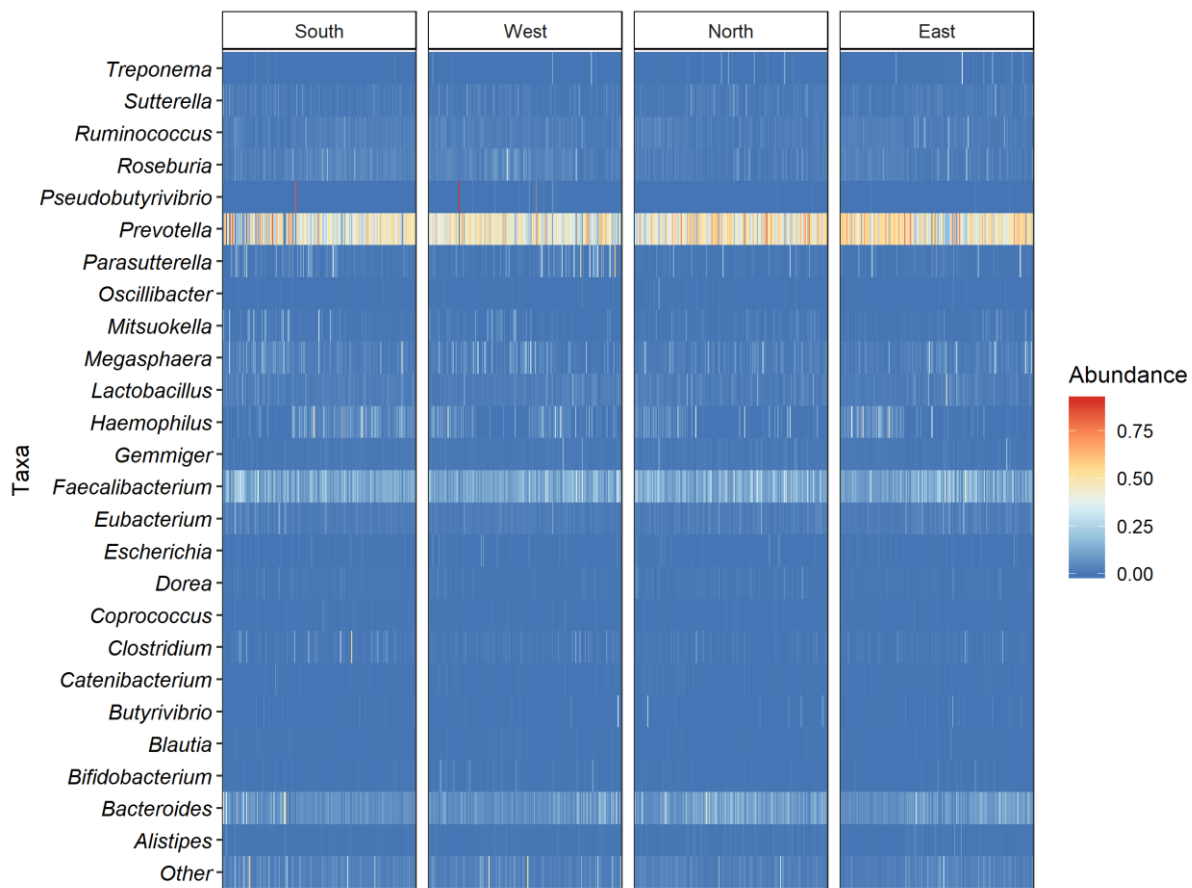

145  
146 **Figure 2:** Inter-individual variation in relative abundance of top 25 gut microbial genera in subject from different  
147 geographical zones in India.

148 Based on unconstrained principal coordinate analysis (PCoA) analysis of OTU-level, no major  
149 separation was observed between the populations from different broadly classified geographic



150 locations *i.e.* north, west, east or southern part of the country (Figure 3). The microbial  
151 community structure was not significantly associated with obesity status of the individuals  
152 within the population (PERMANOVA,  $P = 0.585$ ). Geographical location (city of residence)  
153 explained the most variation (PERMANOVA,  $R^2=0.10$ ,  $\text{Pr}( >F ) = 0.001$ ), followed by  
154 geographical zone (PERMANOVA,  $R^2 = 0.02$ ,  $\text{Pr}( >F ) = 0.001$ ), gender (PERMANOVA,  
155  $R^2=0.002$ ,  $\text{Pr}( >F ) = 0.009$ ) and lifestyle pattern (PERMANOVA,  $R^2 = 0.005$ ,  $\text{Pr}( >F ) = 0.001$ ).

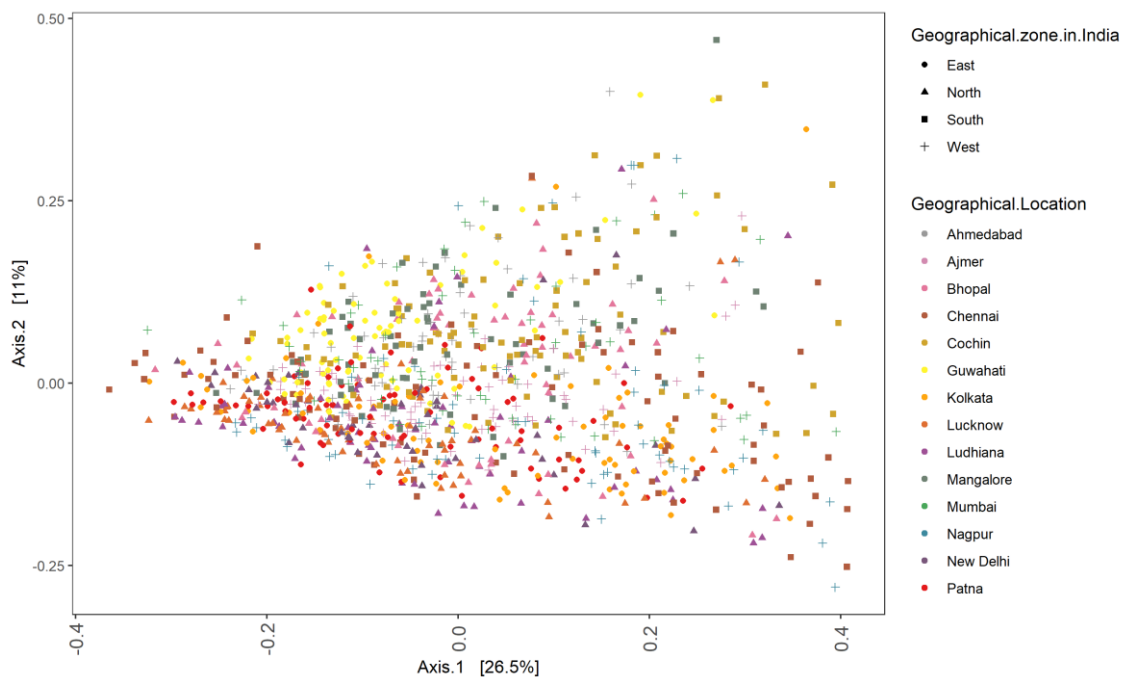

156  
157 **Figure 3:** Principal coordinates analysis (PCoA) based on Bray-Curtis dissimilarity based on OTU relative  
158 abundances.

159 Within each of the geographic zones *i.e.* north, south, east and west, there are differences in the  
160 microbiota structure between the cities (Supplementary Figure 1). The above observations  
161 demonstrate that environmental factors are a major driver of the gut microbiota, especially the  
162 location of residence in the cohort investigated in this study. Further highlighting the effect of  
163 geographic locations and related confounding factors as an important challenge in identifying  
164 health and disease associated biomarkers for the Indian population. A major metadata lacking  
165 in the LogMP study is the dietary intake. Each of the cities sampled in the Log MP study is

166 separated at least 200km, while most are separated by a distance of more than 500 km. Each of  
167 these cities has distinct lifestyle as well as culinary traditions. A comprehensive characterisation  
168 of the gut microbiota and its association with disease will require incorporating information on  
169 diet and lifestyle related cofounding factors in future studies.

### 170 ***Prevalent dominant and rare bacteria in the Indian gut microbiota***

171 Both the dominant and rare fractions of the microbiome play an important role in stability and  
172 resilience of the microbial community (Shade *et al.*, 2014, Lynch & Neufeld, 2015, Shetty *et*  
173 *al.*, 2017, Delgado-Baquerizo *et al.*, 2018, Jia *et al.*, 2018). Identifying bacteria that comprise  
174 the dominant and rare fractions is important to better understand their potential role and  
175 consequent impact on the functioning of the microbiome. Based on the abundance-occupancy  
176 analysis, OTUs from phyla Firmicutes, Bacteroidetes and Proteobacteria were identified as  
177 covering the abundant fractions in the Indian gut microbiota (Figure 4). The most abundant  
178 OTU was from the Firmicutes phyla was *Faecalibacterium prausnitzii* (OTU000444; 0.14,  
179 100%), from Bacteroidetes was *Prevotella copri* (OTU000745; 0.4, 99%), from phylum  
180 Actinobacteria was *Bifidobacterium bifidum* (OTU000175; 0.002, 68%), from Proteobacteria  
181 was *Haemophilus parainfluenzae* (OTU000484; 0.03, 87%), from Spirochaetes was  
182 *Treponema succinifaciens* (OTU000961; 0.004, 73%) and from Verrucomicrobia was  
183 *Akkermansia muciniphila* (OTU000067; 0.002, 61%). Three OTUs from Proteobacteria were  
184 present in more than 90% of the samples (OTU000703:Parasutterella, OTU000468:Gemmiger  
185 and OTU000935:Sutterella with 0.02, 0.01 and 0.009 mean proportional abundance). A detailed  
186 list is given in supplementary table 1.

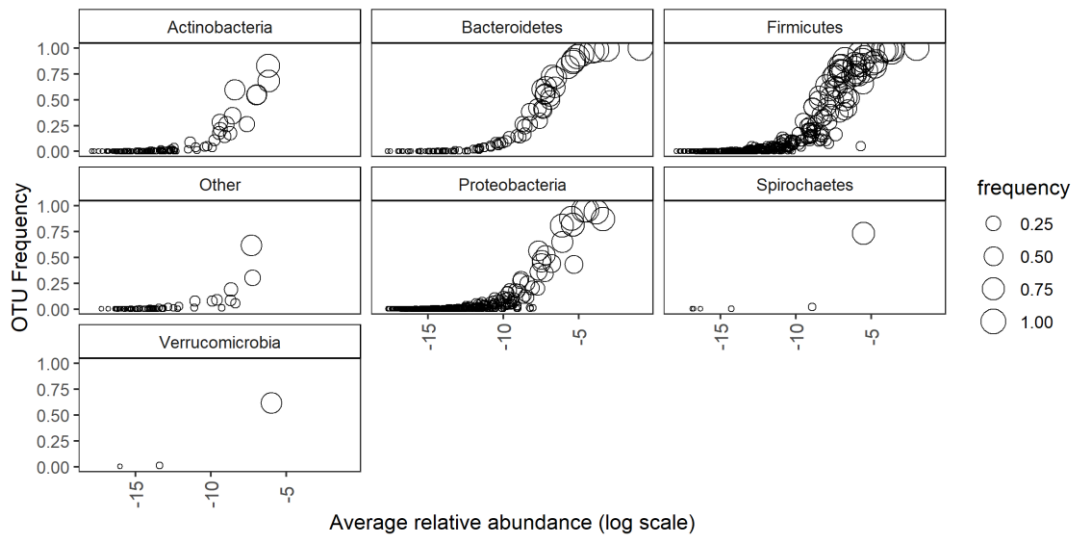

187

188 **Figure 4:** Occupancy-Abundance relationship for OTUs from major phyla in the Indian gut microbiota (n=1003).

189 The x-axis is log transformed for clarity.

190 In the present study, re-analysis of the data was done to gain detailed insight into the core  
191 microbiota following the bootstrap approach as reported previously (Jalanka-Tuovinen *et al.*,  
192 2011, Salonen *et al.*, 2012, Shetty *et al.*, 2017). The change in core size with respect to various  
193 abundance and prevalence thresholds is shown in Figure 5A. The median core size and the core  
194 OTUs were estimated to consist of 12 OTUs (minimum relative abundance threshold of 0.0001  
195 and presence in at least 80%). These included otu000745 (*Prevotella copri*), OTU000444  
196 (*Faecalibacterium prausnitzii*), OTU000162 (*Bacteroides plebeius*), OTU000756 (*Prevotella*  
197 *stercorea*), OTU000542 (*Lactobacillus rogosae*), OTU000814 (*Roseburia faecis*), OTU000149  
198 (*Bacteroides coprophilus*), OTU000834 (*Ruminococcus gnavus*), OTU000594 (*Megasphaera*  
199 *elsdenii*), OTU000426 (*Eubacterium eligens*), OTU000468 (*Gemmiger formicilis*),  
200 OTU000148 (*Bacteroides coprocola*). Investigation of varying abundance and prevalence  
201 thresholds for inclusion of core microbiota aided in identifying both abundant and rare members  
202 of the core microbiota in the Indian population (Figure 5B). The *Prevotella copri* was identified  
203 as the most prevalent and dominant core bacteria across a range of abundance and prevalence  
204 thresholds (Figure 5 A and B). This is in accordance with recent report on the gut microbiota

205 of tribal as well as urban Indian populations (Dehingia *et al.*, 2015, Bhute *et al.*, 2016, Das *et*  
206 *al.*, 2018, Tandon *et al.*, 2018). At the genus level, the core microbiota contributed to a large  
207 fraction of the total microbiota across geographies and gender (Supplementary figure 2).

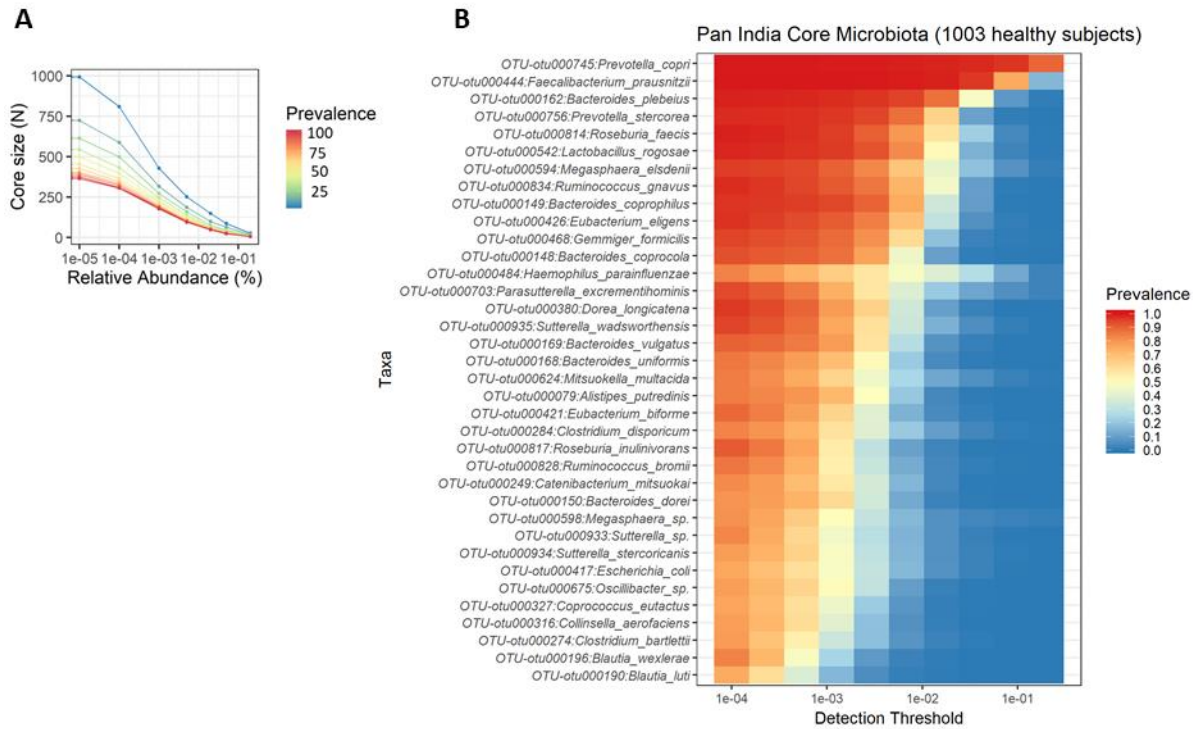

208

209 **Figure 5:** Core microbiota in Indian population. A) The difference in number of core OTUs and their prevalence  
210 at different abundance thresholds. B) Heatmap depicting the core OTUs, their prevalence at different detection  
211 thresholds (relative abundance).

212 The dominance and prevalence of *Faecalibacterium* is associated with both western and non-  
213 western populations (Falony *et al.*, 2016, Shetty *et al.*, 2017). Prevalence and abundance of  
214 *Prevotella* is associated with gut microbiota of non-western populations (Falony *et al.*, 2016).  
215 In our study, we identify both of these genera as a part of the Indian core microbiota. These  
216 bacteria have a range of metabolic traits related to degradation of complex polysaccharides  
217 (David *et al.*, 2014, Heinken *et al.*, 2014). However, there is a lack of direct evidence of  
218 complex fibre degradation ability for *Prevotella copri*, the most abundant and prevalent species  
219 detected in the gut microbiome. This species is known to have  $\beta$ -Galactosidase,  $\alpha$ -

220 Arabinofuranosidase and  $\beta$ -Glucosidase activity (Hayashi *et al.*, 2007). On the contrary  
221 numerous evidence exists for polysaccharide degradation ability in species from the genus  
222 *Bacteroides* (Sonnenburg *et al.*, 2010). Further investigation of physiology and polysaccharide  
223 degrading ability of *Prevotella* and its species/strains across human populations will be crucial  
224 to better understand its role in the gut microbiome.

225 ***Prevotella dominance is hallmark of Indian gut microbiota irrespective of geographic***  
226 ***location, age, gender and BMI***

227 The dominance of *Prevotella* or *Bacteroides* is an important property of the human gut  
228 microbiome as these bacteria are known to be biomarkers of diet and lifestyle (Gorvitovskaia  
229 *et al.*, 2016). Hence, the *Prevotella* versus *Bacteroides* (P/B) ratio in the microbiota of Indian  
230 subjects was investigated in all the subjects (n=1003). The obese individuals were also included  
231 in this analysis because there no strong effect of obesity status was observed on the microbiota  
232 community composition (see above). A continuum was detected irrespective of the BMI values  
233 where only a few subjects had exhibited high P/B ratio (Figure 6A). The subjects across  
234 geographies had a microbiota characterised by high P/B ratio (Figure 6B). Additionally, no  
235 significant correlation was observed between BMI and age with P/B ratio in the study cohort  
236 (Supplementary figure 3). The differences of P/B ratio between genders (male/female) was also  
237 not significant (Supplementary figure 4). P/B ratio showed significant correlation with the  
238 PCoA axis 1 which explained 30.6% of the variation in the microbial community in the study  
239 cohort (Supplementary figure 5).

240

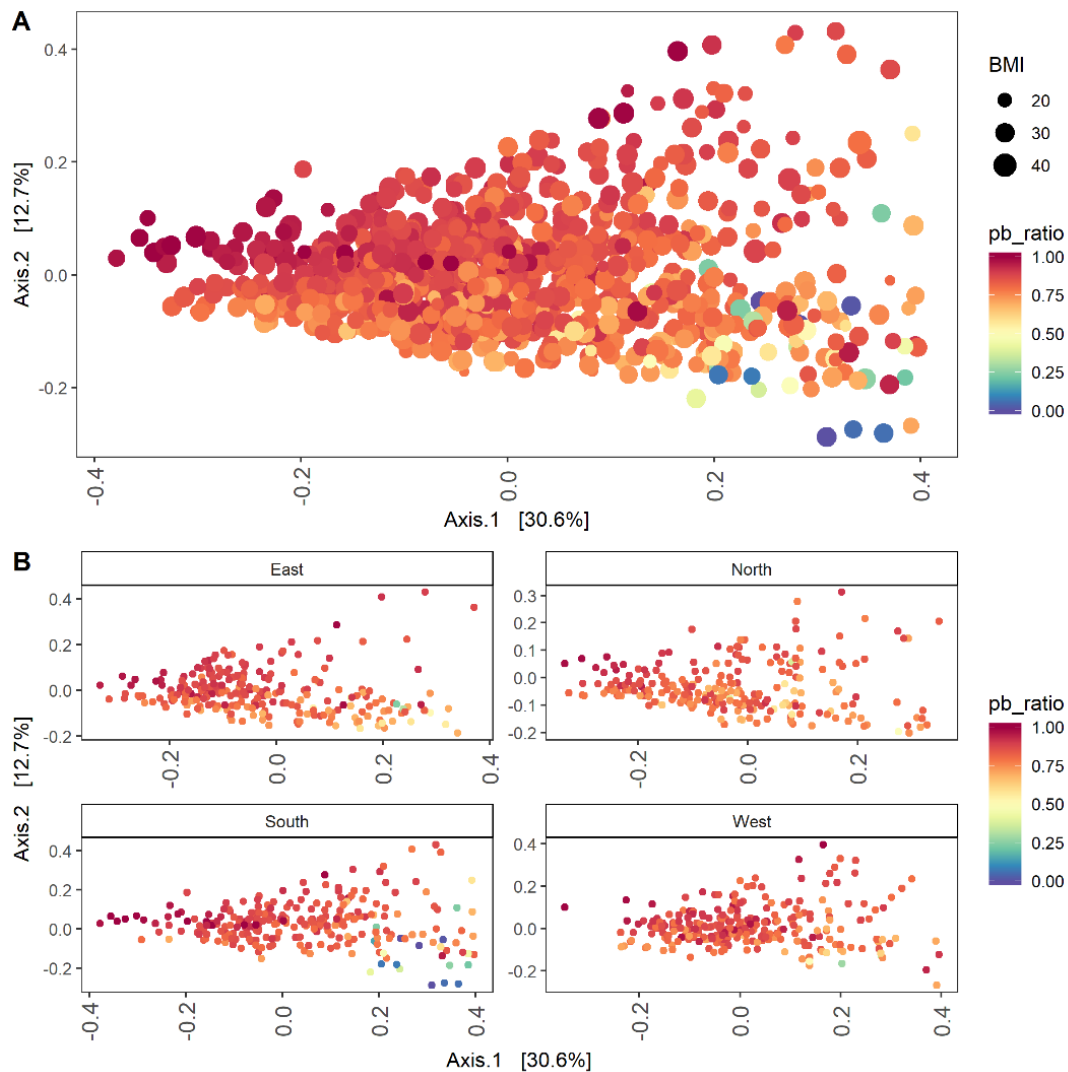

241

242 **Figure 6:** Principal coordinates analysis based on Bray-Curtis dissimilarity based on genus level relative  
243 abundances. **A]** PCoA depicting the gradient of *Prevotella/Bacteroides* ratio and distribution of body mass index  
244 (BMI) in 1003 Indian subjects. **B]** Same PCoA as in panel A, but coloured and faceted for depicting the  
245 distribution of *Prevotella/Bacteroides* ratio in the Indian gut microbiota in different geographical zones (East, n =  
246 250; North, n = 243; South, n = 250; West, n = 260).

## 247 **Summary**

248 The gut microbiome of Indian subjects differs in composition at phylum level across the four  
249 geographical zones. Overall variation in the gut microbial community structure in Indians is  
250 mostly driven by city of residence. Despite the large differences in the geographic location,  
251 there exists a core of 12 OTUs that are shared among 80% of the subjects. These core OTUs

252 are classified as members of genera that are known for their ability to degrade complex  
253 polysaccharides (*Prevotella*, *Bacteroides*), produce butyrate and propionate (*Faecalibacterium*,  
254 *Megasphaera*) as well as ability to degrade mucin (*Ruminococcus gnavus*). Compared to the  
255 Westernized urban populations, the Indian population still harbours features of non-  
256 industrialized gut microbiota such as *Treponema*, which was present in 73% of the subjects at  
257 a low mean relative abundance of 0.004. Previously, *Treponema* was found to be characteristic  
258 of a traditional microbiome (Obregon-Tito *et al.*, 2015). Therefore, efforts need to be made for  
259 cultivating and preserving human gut origin *Treponema* isolates from diverse populations that  
260 are undergoing rapid transition towards a Western lifestyle. The majority of variation in the  
261 microbial community structure was correlated with the ratio of *Prevotella* versus *Bacteroides*.  
262 However, due to lack of information on dietary habits, no concrete associations could be made  
263 to explain the high P/B ratio observed in the Indian population. Since both *Bacteroides* and  
264 *Prevotella* are capable of degrading complex polysaccharides, there is need to identify the trade-  
265 off between *Prevotella* or *Bacteroides* domination in the Westernized and urban Indian gut  
266 microbiota.

## 267 **Methods**

### 268 ***Data from LogMPIE***

269 The data analysed in this study was obtained from figshare (Dubey *et al.*, 2018). Detailed  
270 information on sample collection and processing for DNA extraction, 16S rRNA gene  
271 amplification and sequencing are provided in the original publication (Dubey *et al.*, 2018).  
272 Here, some key points are described. The samples were collected by participants using sterile  
273 OMNIgene®•GUT stool collection kit. DNA extraction was done using the QiaAmp DNA  
274 Stool Mini Kit (Qiagen, Hilden, Germany). Two primer pairs one of V3 and one for V4  
275 hypervariable region of the 16S rRNA gene was used for amplification (Milani *et al.*, 2013,  
276 Dubey *et al.*, 2018). The sequencing was done Ion S5 System (Thermo Fisher Scientific,



277 Carlsbad, CA, USA). OTU tables were obtained by processing raw reads following the QIIME  
278 workflow on the Ion Reporter Server. OTU picking was done using the  
279 *pick\_closed\_reference\_otus.py* command in QIIME (Caporaso *et al.*, 2010).

### 280 ***Microbial community data handling, analysis and visualisation***

281 The relative abundance microbial profiling data and metadata were obtained from (Dubey *et*  
282 *al.*, 2018)( <https://doi.org/10.6084/m9.figshare.c.4147079.v1>). The taxonomy was corrected to  
283 make it compatible with *read\_phyloseq* function of microbiome R package (Lahti & Shetty,  
284 2018). The resulting phyloseq object was analysed in R (v3.5.1) using the phyloseq (v1.24.1)  
285 and microbiome R package (v1.2.1) (McMurdie & Holmes, 2013, Lahti & Shetty, 2018). One  
286 subject, Subject-8032 was removed since initial ordinations revealed it to be highly divergent  
287 and thus the analysis was limited to 1003 subjects. Data visualisation was done using a  
288 combination of ggplot2 (v3.1) and ggpubr (v0.1.8) packages.

### 289 ***Statistical analysis***

290 The dissimilarity in gut microbiota composition between the subjects were investigated using  
291 the Bray-Curtis dissimilarity index calculated at OTU level and genus level relative abundance  
292 data using the phyloseq R package. The unconstrained principal coordinates analysis PCoA  
293 ordinations were visualised using the *plot\_ordination* function. The contribution of each of the  
294 metadata categories, geographical location (city of residence), geographical zone, gender, and  
295 lifestyle pattern was investigated using PERMANOVA (999 permutations) (*adonis* function,  
296 *vegan* (v2.5-3) R package). Pair-wise comparisons were done using Wilcoxon test. Correlations  
297 between Prevotella versus Bacteroides ratios with age, BMI and PCoA axis 1 were based on  
298 Pearson's correlations and done using the *stat\_cor* function and visualised using *ggscatter*  
299 function in ggpubr.



### 300 ***Core microbiota analysis***

301 The core microbiota analysis was done using the blanket approach (Salonen *et al.*, 2012). In  
302 this approach, the random sub-samples are drawn and the frequency of an OTU to be present  
303 in user defined samples (here, 810 samples) at a minimum relative abundance threshold (here,  
304 0.0001) was calculated. Using 1000 bootstrap (boot, v1.3-20, R package) the median core size  
305 was estimated (Canty & Ripley, 2012). The effect of prevalence and abundance thresholds as  
306 well as the abundance and prevalence distribution of core OTUs were visualized using the  
307 microbiome R package (Lahti & Shetty, 2018).

### 308 ***Prevotella/Bacteroides ratio analysis***

309 The *Prevotella/Bacteroides* ratio were analysed using the approach described previously  
310 (Gorvitovskaia *et al.*, 2016). The OTU data was aggregated at genus level and used for further  
311 analysis.

### 312 **Acknowledgement**

313 The author would like to thank Ashok Kumar Dubey, Niyati Uppadhyaya, Pravin Nilawe,  
314 Neeraj Chauhan, Santosh Kumar, Urmila Anurag Gupta and Anirban Bhaduri, the authors of  
315 the “Landscape Of Gut Microbiome - Pan-India Exploration”, or LogMPIE study for making  
316 the data free and openly accessible. Without LogMPIE data this study would not have been  
317 possible.

### 318 **Funding**

319 SAS is employed by the Laboratory of Microbiology Wageningen University and Research.  
320 This research was partly funded by the Netherlands Organisation for Scientific Research  
321 (NOW) Soehngen Institute of Anaerobic Microbiology (SIAM) grant and the NWO UNLOCK  
322 grant. The funders had no role in design and interpretation of this study.

## 323 **Conflict of interest**

324 The author declares no conflict of interest.

## 325 **Data and code availability**

326 The raw sequencing files are made available by the authors at European nucleotide archive  
327 (ENA) under the primary accession code, PRJEB25642, and secondary accession code,  
328 ERP07577 (Dubey *et al.*, 2018). The codes used for the analysis done in this manuscript will  
329 be made available at the following GitHub repository ([https://github.com/microsud/Indian-gut-](https://github.com/microsud/Indian-gut-microbiota)  
330 [microbiota](https://github.com/microsud/Indian-gut-microbiota)).

331

## 332 **References**

- 333 Barcenilla A, Pryde SE, Martin JC, Duncan SH, Stewart CS, Henderson C & Flint HJ (2000)  
334 Phylogenetic relationships of butyrate-producing bacteria from the human gut. *Applied and*  
335 *environmental microbiology* **66**: 1654-1661.
- 336 Baxter NT, Ruffin MT, Rogers MA & Schloss PD (2016) Microbiota-based model improves  
337 the sensitivity of fecal immunochemical test for detecting colonic lesions. *Genome medicine* **8**:  
338 37.
- 339 Bhute S, Pande P, Shetty SA, Shelar R, Mane S, Kumbhare SV, Gawali A, Makhani H,  
340 Navandar M & Dhotre D (2016) Molecular characterization and meta-analysis of gut microbial  
341 communities illustrate enrichment of Prevotella and Megaspheara in Indian subjects. *Frontiers*  
342 *in microbiology* **7**: 660.
- 343 Canty A & Ripley B (2012) boot: Bootstrap R (S-Plus) functions. *R package version 1*.
- 344 Caporaso JG, Kuczynski J, Stombaugh J, Bittinger K, Bushman FD, Costello EK, Fierer N,  
345 Pena AG, Goodrich JK & Gordon JI (2010) QIIME allows analysis of high-throughput  
346 community sequencing data. *Nature methods* **7**: 335.
- 347 Cotillard A, Kennedy SP, Kong LC, Prifti E, Pons N, Le Chatelier E, Almeida M, Quinquis B,  
348 Levenez F & Galleron N (2013) Dietary intervention impact on gut microbial gene richness.  
349 *Nature* **500**: 585-588.
- 350 Dao MC, Everard A, Aron-Wisniewsky J, Sokolovska N, Prifti E, Verger EO, Kayser BD,  
351 Levenez F, Chilloux J & Hoyles L (2015) Akkermansia muciniphila and improved metabolic  
352 health during a dietary intervention in obesity: relationship with gut microbiome richness and  
353 ecology. *Gut* gutjnl-2014-308778.
- 354 Das B, Ghosh TS, Kedia S, Rampal R, Saxena S, Bag S, Mitra R, Dayal M, Mehta O &  
355 Surendranath A (2018) Analysis of the gut microbiome of rural and urban healthy Indians living  
356 in sea level and high altitude areas. *Scientific reports* **8**: 10104.
- 357 David LA, Maurice CF, Carmody RN, Gootenberg DB, Button JE, Wolfe BE, Ling AV, Devlin  
358 AS, Varma Y & Fischbach MA (2014) Diet rapidly and reproducibly alters the human gut  
359 microbiome. *Nature* **505**: 559-563.
- 360 De Filippo C, Cavalieri D, Di Paola M, Ramazzotti M, Poullet JB, Massart S, Collini S,  
361 Pieraccini G & Lionetti P (2010) Impact of diet in shaping gut microbiota revealed by a

- 362 comparative study in children from Europe and rural Africa. *Proceedings of the National*  
363 *Academy of Sciences* **107**: 14691-14696.
- 364 Dehingia M, Talukdar NC, Talukdar R, Reddy N, Mande SS, Deka M & Khan MR (2015) Gut  
365 bacterial diversity of the tribes of India and comparison with the worldwide data. *Scientific*  
366 *reports* **5**: 18563.
- 367 Delgado-Baquerizo M, Oliverio AM, Brewer TE, Benavent-González A, Eldridge DJ, Bardgett  
368 RD, Maestre FT, Singh BK & Fierer N (2018) A global atlas of the dominant bacteria found in  
369 soil. *Science* **359**: 320-325.
- 370 Desai MS, Seekatz AM, Koropatkin NM, Kamada N, Hickey CA, Wolter M, Pudlo NA,  
371 Kitamoto S, Terrapon N & Muller A (2016) A dietary fiber-deprived gut microbiota degrades  
372 the colonic mucus barrier and enhances pathogen susceptibility. *Cell* **167**: 1339-1353. e1321.
- 373 Dubey AK, Uppadhyaya N, Nilawe P, Chauhan N, Kumar S, Gupta UA & Bhaduri A (2018)  
374 LogMPIE, pan-India profiling of the human gut microbiome using 16S rRNA sequencing.  
375 *Scientific Data* **5**: 180232.
- 376 Everard A, Belzer C, Geurts L, Ouwerkerk JP, Druart C, Bindels LB, Guiot Y, Derrien M,  
377 Muccioli GG & Delzenne NM (2013) Cross-talk between *Akkermansia muciniphila* and  
378 intestinal epithelium controls diet-induced obesity. *Proceedings of the National Academy of*  
379 *Sciences* **110**: 9066-9071.
- 380 Falony G, Joossens M, Vieira-Silva S, *et al.* (2016) Population-level analysis of gut microbiome  
381 variation. *Science* **352**: 560-564.
- 382 Flint HJ, Scott KP, Louis P & Duncan SH (2012) The role of the gut microbiota in nutrition  
383 and health. *Nature Reviews Gastroenterology and Hepatology* **9**: 577.
- 384 Flint HJ, Scott KP, Duncan SH, Louis P & Forano E (2012) Microbial degradation of complex  
385 carbohydrates in the gut. *Gut microbes* **3**: 289-306.
- 386 Ghosh TS, Gupta SS, Nair GB & Mande SS (2013) In silico analysis of antibiotic resistance  
387 genes in the gut microflora of individuals from diverse geographies and age-groups. *PLoS One*  
388 **8**: e83823.
- 389 Gorvitovskaia A, Holmes SP & Huse SM (2016) Interpreting *Prevotella* and *Bacteroides* as  
390 biomarkers of diet and lifestyle. *Microbiome* **4**: 1.
- 391 Hayashi H, Shibata K, Sakamoto M, Tomita S & Benno Y (2007) *Prevotella copri* sp. nov. and  
392 *Prevotella stercorea* sp. nov., isolated from human faeces. *International journal of systematic*  
393 *and evolutionary microbiology* **57**: 941-946.
- 394 Heinken A, Khan MT, Paglia G, Rodionov DA, Harmsen HJM & Thiele I (2014) Functional  
395 metabolic map of *Faecalibacterium prausnitzii*, a beneficial human gut microbe. *Journal of*  
396 *Bacteriology* **196**: 3289-3302.
- 397 Hosseini E, Grootaert C, Verstraete W & Van de Wiele T (2011) Propionate as a health-  
398 promoting microbial metabolite in the human gut. *Nutrition Reviews* **69**: 245-258.
- 399 Human Microbiome Project C (2012) Structure, function and diversity of the healthy human  
400 microbiome. *Nature* **486**: 207-214.
- 401 Huse SM, Ye Y, Zhou Y & Fodor AA (2012) A core human microbiome as viewed through  
402 16S rRNA sequence clusters. *PloS one* **7**: e34242.
- 403 Huttenhower C, Gevers D, Knight R, Abubucker S, Badger JH, Chinwalla AT, Creasy HH, Earl  
404 AM, FitzGerald MG & Fulton RS (2012) Structure, function and diversity of the healthy human  
405 microbiome. *Nature* **486**: 207.
- 406 Jalanka-Tuovinen J, Salonen A, Nikkilä J, Immonen O, Kekkonen R, Lahti L, Palva A & de  
407 Vos WM (2011) Intestinal microbiota in healthy adults: temporal analysis reveals individual  
408 and common core and relation to intestinal symptoms. *PloS one* **6**: e23035.
- 409 Jia X, Dini-Andreote F & Salles JF (2018) Community Assembly Processes of the Microbial  
410 Rare Biosphere. *Trends in microbiology*.
- 411 Lahti L & Shetty SA (2018) Tools for microbiome analysis in R.

- 412 Lahti L, Salojärvi J, Salonen A, Scheffer M & de Vos WM (2014) Tipping elements in the  
413 human intestinal ecosystem. *Nat Commun* **5**.
- 414 Li J, Jia H, Cai X, Zhong H, Feng Q, Sunagawa S, Arumugam M, Kultima JR, Prifti E &  
415 Nielsen T (2014) An integrated catalog of reference genes in the human gut microbiome. *Nat*  
416 *Biotech* **32**: 834-841.
- 417 Lin HV, Frassetto A, Kowalik Jr EJ, Nawrocki AR, Lu MM, Kosinski JR, Hubert JA, Szeto D,  
418 Yao X & Forrest G (2012) Butyrate and propionate protect against diet-induced obesity and  
419 regulate gut hormones via free fatty acid receptor 3-independent mechanisms. *PloS one* **7**:  
420 e35240.
- 421 Louis P & Flint HJ (2017) Formation of propionate and butyrate by the human colonic  
422 microbiota. *Environmental microbiology* **19**: 29-41.
- 423 Lynch MD & Neufeld JD (2015) Ecology and exploration of the rare biosphere. *Nature Reviews*  
424 *Microbiology* **13**: 217.
- 425 Martínez I, Stegen JC, Maldonado-Gómez MX, Eren AM, Siba PM, Greenhill AR & Walter J  
426 (2015) The gut microbiota of rural papua new guineans: composition, diversity patterns, and  
427 ecological processes. *Cell reports* **11**: 527-538.
- 428 McMurdie PJ & Holmes S (2013) phyloseq: an R package for reproducible interactive analysis  
429 and graphics of microbiome census data. *PloS one* **8**: e61217.
- 430 Milani C, Hevia A, Feroni E, Duranti S, Turroni F, Lugli GA, Sanchez B, Martin R, Gueimonde  
431 M & Van Sinderen D (2013) Assessing the fecal microbiota: an optimized ion torrent 16S rRNA  
432 gene-based analysis protocol. *PloS one* **8**: e68739.
- 433 O'Keefe SJD, Li JV, Lahti L, *et al.* (2015) Fat, fibre and cancer risk in African Americans and  
434 rural Africans. *Nat Commun* **6**: 6342.
- 435 Obregon-Tito AJ, Tito RY, Metcalf J, Sankaranarayanan K, Clemente JC, Ursell LK, Xu ZZ,  
436 Van Treuren W, Knight R & Gaffney PM (2015) Subsistence strategies in traditional societies  
437 distinguish gut microbiomes. *Nat Commun* **6**: 6505.
- 438 Plovier H, Everard A, Druart C, Depommier C, Van Hul M, Geurts L, Chilloux J, Ottman N,  
439 Duparc T & Lichtenstein L (2017) A purified membrane protein from *Akkermansia muciniphila*  
440 or the pasteurized bacterium improves metabolism in obese and diabetic mice. *Nature medicine*  
441 **23**: 107.
- 442 Qin J, Li R, Raes J, Arumugam M, Burgdorf KS, Manichanh C, Nielsen T, Pons N, Levenez F  
443 & Yamada T (2010) A human gut microbial gene catalogue established by metagenomic  
444 sequencing. *nature* **464**: 59-65.
- 445 Qin J, Li Y, Cai Z, *et al.* (2012) A metagenome-wide association study of gut microbiota in  
446 type 2 diabetes. *Nature* **490**: 55-60.
- 447 Reichardt N, Duncan SH, Young P, Belenguer A, Leitch CM, Scott KP, Flint HJ & Louis P  
448 (2014) Phylogenetic distribution of three pathways for propionate production within the human  
449 gut microbiota. *The ISME journal* **8**: 1323.
- 450 Rothschild D, Weissbrod O, Barkan E, Kurilshikov A, Korem T, Zeevi D, Costea PI, Godneva  
451 A, Kalka IN & Bar N (2018) Environment dominates over host genetics in shaping human gut  
452 microbiota. *Nature* **555**: 210.
- 453 Salonen A, Salojärvi J, Lahti L & De Vos W (2012) The adult intestinal core microbiota is  
454 determined by analysis depth and health status. *Clinical Microbiology and Infection* **18**: 16-20.
- 455 Schubert AM, Rogers MA, Ring C, Mogle J, Petrosino JP, Young VB, Aronoff DM & Schloss  
456 PD (2014) Microbiome data distinguish patients with *Clostridium difficile* infection and non-  
457 *C. difficile*-associated diarrhea from healthy controls. *MBio* **5**: e01021-01014.
- 458 Shade A, Jones SE, Caporaso JG, Handelsman J, Knight R, Fierer N & Gilbert JA (2014)  
459 Conditionally rare taxa disproportionately contribute to temporal changes in microbial  
460 diversity. *MBio* **5**: e01371-01314.

- 461 Shetty SA, Marathe NP & Shouche YS (2013) Opportunities and challenges for gut microbiome  
462 studies in the Indian population. *Microbiome* **1**: 24.
- 463 Shetty SA, Hugenholtz F, Lahti L, Smidt H & de Vos WM (2017) Intestinal microbiome  
464 landscaping: insight in community assemblage and implications for microbial modulation  
465 strategies. *FEMS microbiology reviews* **41**: 182-199.
- 466 Sonnenburg ED, Zheng H, Joglekar P, Higginbottom SK, Firbank SJ, Bolam DN & Sonnenburg  
467 JL (2010) Specificity of polysaccharide use in intestinal bacteroides species determines diet-  
468 induced microbiota alterations. *Cell* **141**: 1241-1252.
- 469 Tandon D, Haque MM, Saravanan R, Shaikh S, Sriram P, Dubey AK & Mande SS (2018) A  
470 snapshot of gut microbiota of an adult urban population from Western region of India. *PloS one*  
471 **13**: e0195643.
- 472 Turnbaugh PJ, Hamady M, Yatsunenko T, Cantarel BL, Duncan A, Ley RE, Sogin ML, Jones  
473 WJ, Roe BA & Affourtit JP (2009) A core gut microbiome in obese and lean twins. *nature* **457**:  
474 480-484.
- 475 Yajnik CS & Yudkin JS (2004) The YY paradox. *The Lancet* **363**: 163.
- 476 Yano JM, Yu K, Donaldson GP, Shastri GG, Ann P, Ma L, Nagler CR, Ismagilov RF,  
477 Mazmanian SK & Hsiao EY (2015) Indigenous bacteria from the gut microbiota regulate host  
478 serotonin biosynthesis. *Cell* **161**: 264-276.
- 479 Yatsunenko T, Rey FE, Manary MJ, Trehan I, Dominguez-Bello MG, Contreras M, Magris M,  
480 Hidalgo G, Baldassano RN & Anokhin AP (2012) Human gut microbiome viewed across age  
481 and geography. *Nature* **486**: 222-227.
- 482 Zeller G, Tap J, Voigt AY, Sunagawa S, Kultima JR, Costea PI, Amiot A, Böhm J, Brunetti F  
483 & Habermann N (2014) Potential of fecal microbiota for early-stage detection of colorectal  
484 cancer. *Molecular systems biology* **10**: 766.
- 485 Zhang J, Guo Z, Lim AAQ, Zheng Y, Koh EY, Ho D, Qiao J, Huo D, Hou Q & Huang W  
486 (2014) Mongolians core gut microbiota and its correlation with seasonal dietary changes.  
487 *Scientific reports* **4**.
- 488 Zhang J, Guo Z, Lim AAQ, Zheng Y, Koh EY, Ho D, Qiao J, Huo D, Hou Q & Huang W  
489 (2014) Mongolians core gut microbiota and its correlation with seasonal dietary changes.  
490 *Scientific reports* **4**: 5001.



492 **Supplementary data**

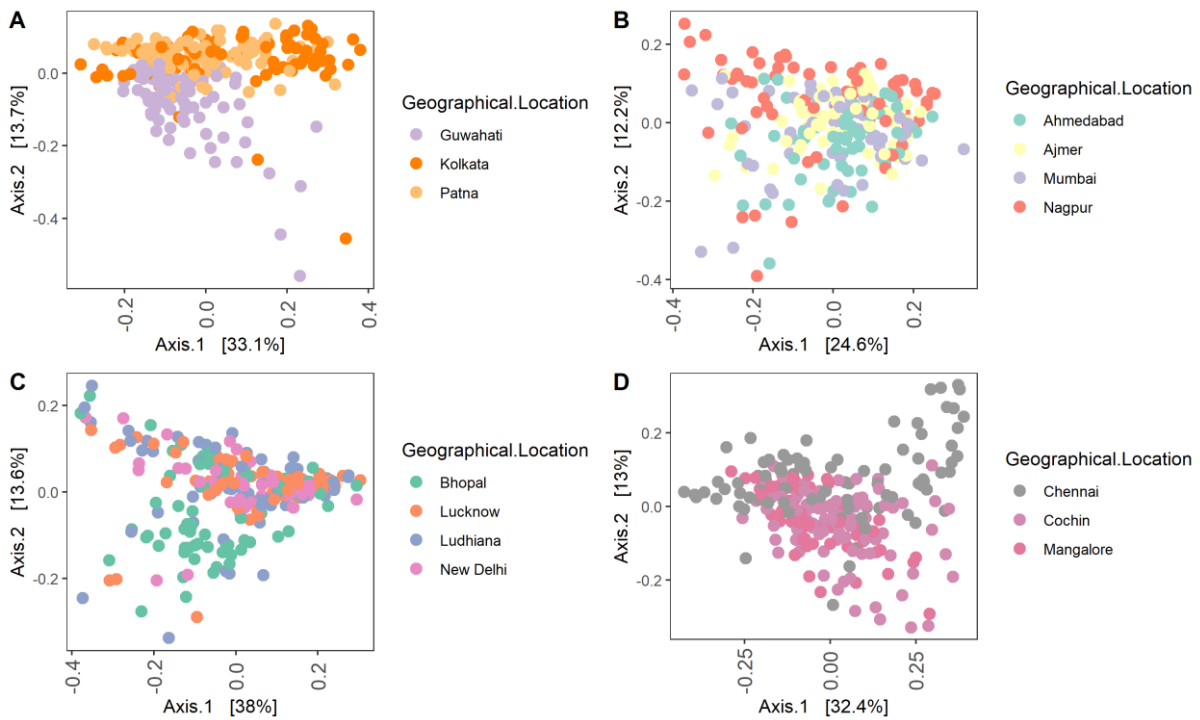

493

494 **Supplementary figure 1:** Principal coordinates analysis (PCoA) based on Bray-Curtis dissimilarity based on  
495 genus-level relative abundances. **A]** East; **B]** West; **C]** North **D]** South.

496

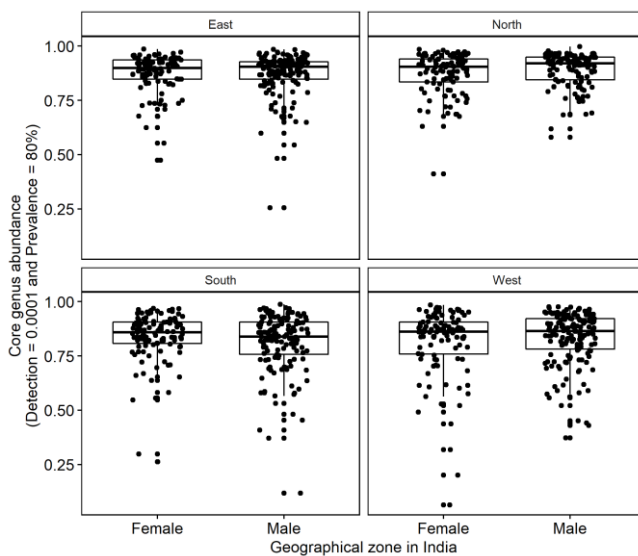

497

498 **Supplementary figure 2:** Contribution of 13 core genera towards the total abundance in the Indian female (n =  
499 419) and male (n = 584) gut microbiota. The core microbiota was determined based on a minimum relative

500 abundance of 0.0001 in present in minimum of 80% subjects (1000 bootstraps). The core genera were *Prevotella*,  
501 *Faecalibacterium*, *Bacteroides*, *Eubacterium*, *Roseburia*, *Ruminococcus*, *Lactobacillus*, *Megasphaera*, *Sutterella*,  
502 *Gemmiger*, *Blautia*, *Clostridium*, *Dorea*

503

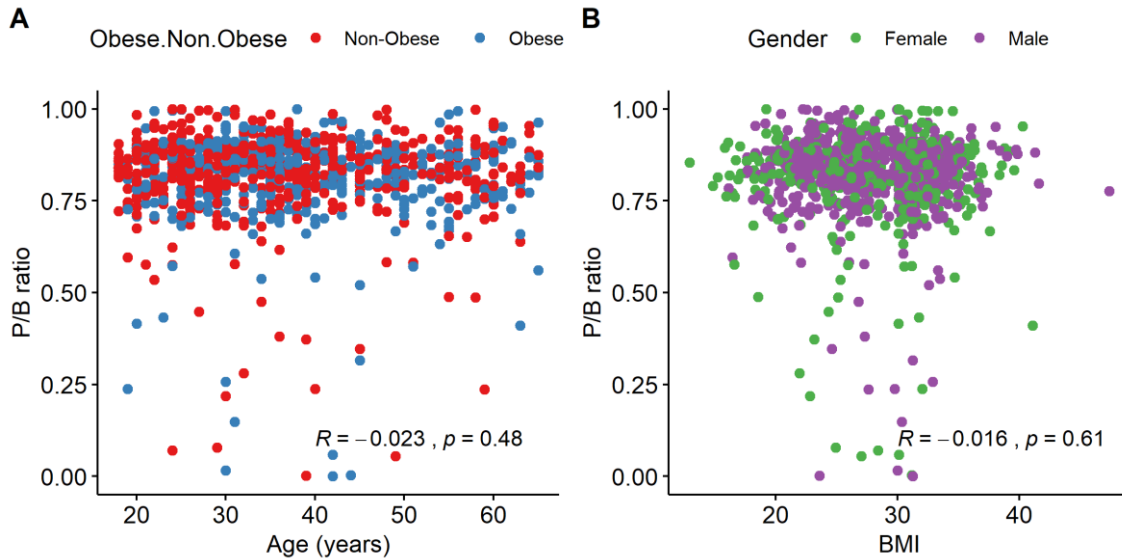

504

505 **Supplementary figure 3:** Pearson's correlation analysis. **A]** Relationship between *Prevotella/Bacteroides* ratio  
506 and Age. **B]** Relationship between *Prevotella/Bacteroides* ratio and body mass index (BMI).

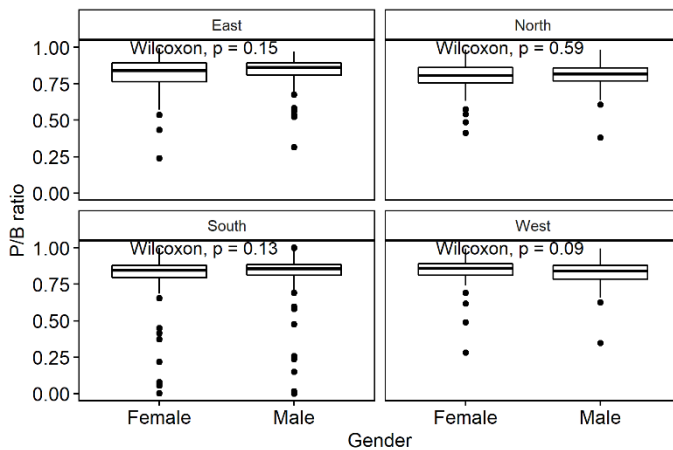

507

508 **Supplementary figure 4:** Comparison of P/B ratio between genders from different geographical locations. The p-  
509 values were calculated using Wilcoxon test.

510

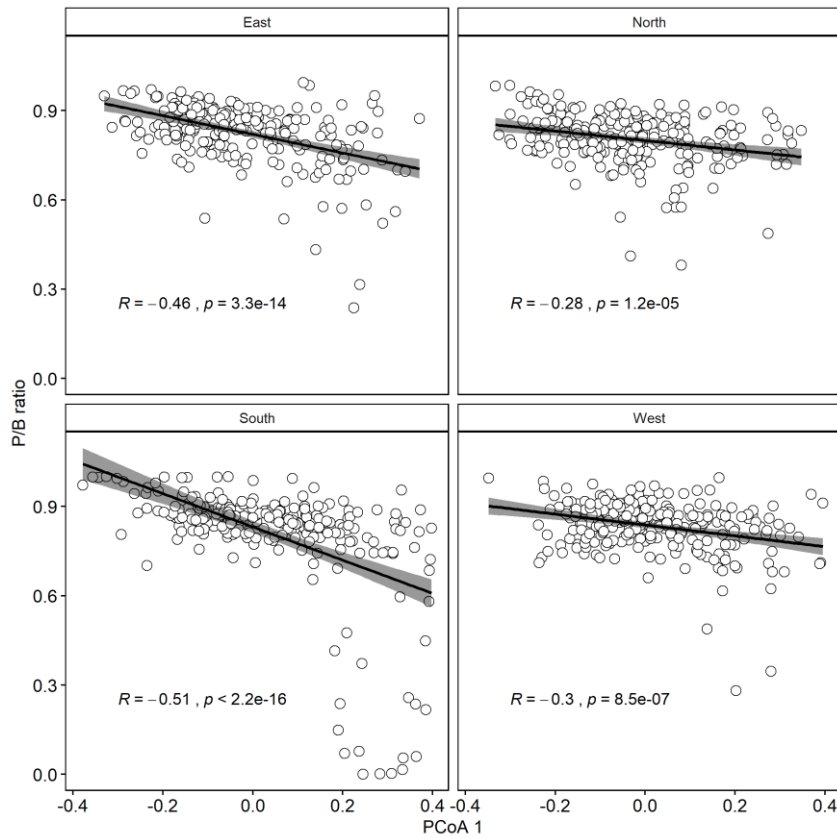

511

512 **Supplementary figure 5:** Pearson's correlation between PCoA axis 1 and P/B ratio.

513
